# Supplementary material
Source: HighWire-hosted journal article supplement (https://bmjopen.bmj.com/content/11/11/e056436)
Supplement: inline-supplementary-material-1 [file inline-supplementary-material-1.pdf]

Supplementary Table 1. Description of coding systems and codes

| Coding system                                | Code                                                        | Description                                                       |
|----------------------------------------------|-------------------------------------------------------------|-------------------------------------------------------------------|
| <i>Codes for COVID-19 diagnoses</i>          |                                                             |                                                                   |
| ICD-10                                       | U07.1, U07.2                                                | COVID-19 (WHO)                                                    |
| ICD-10                                       | B97.29                                                      | Other coronavirus as the cause of diseases classified elsewhere   |
| ICD-10                                       | B34.2                                                       | Coronavirus infection, unspecified                                |
| ICD-10                                       | J12.81                                                      | Pneumonia due to SARS-associated coronavirus                      |
| LOINC                                        | 94505-5,94506-3,94558-4, 94562-6, 94762-2, 94769-7, 95209-3 | SARS-CoV-2 (COVID19) [Presence] in Serum or Plasma by Immunoassay |
| <i>Comorbidity conditions</i>                |                                                             |                                                                   |
| ICD-10                                       | I10                                                         | Essential (primary) hypertension                                  |
| ICD-10                                       | J40-J47                                                     | Chronic lower respiratory diseases                                |
| ICD-10                                       | E10-E11                                                     | Diabetes (type I and type II)                                     |
| ICD-10                                       | E66                                                         | Overweight and obesity                                            |
| ICD-10                                       | I20-I25                                                     | Ischemic heart diseases                                           |
| ICD-10                                       | I50                                                         | Heart failure                                                     |
| ICD-10                                       | N18                                                         | Chronic kidney disease                                            |
| ICD-10                                       | F17                                                         | Nicotine dependence                                               |
| ICD-10                                       | F10                                                         | Alcohol related disorders                                         |
| ICD-10                                       | Z55-Z65                                                     | Socioeconomic and psychosocial circumstances                      |
| <i>Laboratory codes for diagnostic tests</i> |                                                             |                                                                   |
| LOINC                                        | 8480-6,76215-3,76534-7,87739-9,87741-5,8459-0,8460-8,8461-6 | Systolic blood pressure                                           |
| LOINC                                        | 8462-4,76535-4,87740-7,87736-5,8453-3,8454-1,8455-8,76213-8 | Diastolic blood pressure                                          |
| LOINC                                        | 26464-8,49498-9,6690-2,804-5                                | Leukocytes                                                        |
| LOINC                                        | 26478-8,30365-1,736-9,737-7                                 | Lymphocyte count                                                  |
| LOINC                                        | 26499-4,751-8,753-4                                         | Neutrophil count                                                  |
| LOINC                                        | 26515-7,49497-1,777-3,778-1                                 | Platelets                                                         |
| LOINC                                        | 2160-0,38483-4                                              | Serum creatinine                                                  |
| LOINC                                        | 3094-0,6299-2                                               | Blood urea nitrogen                                               |
| LOINC                                        | 14804-9,14805-6,2532-0                                      | Lactate dehydrogenase                                             |
| LOINC                                        | 1742-6,1743-4,1744-2,76625-3                                | Alanine aminotransferase                                          |
| LOINC                                        | 1920-8,30239-8                                              | Aspartate aminotransferase                                        |
| LOINC                                        | 1783-0,6768-6                                               | Alkaline phosphatase                                              |
| LOINC                                        | 20567-4,2276-4,24373-3                                      | Serum ferritin                                                    |
| LOINC                                        | 10839-9,42757-5                                             | Troponin I                                                        |
| LOINC                                        | 1988-5,30522-7,71426-1                                      | C-reactive protein                                                |

Supplementary Table 2. Healthcare utilization among COVID-19 patients on long-term opioid therapy compared to COVID-19 patients not on long-term opioid therapy

| Utilization     | Before propensity score matching          |                                                |                     | After propensity score matching           |                                              |                     |
|-----------------|-------------------------------------------|------------------------------------------------|---------------------|-------------------------------------------|----------------------------------------------|---------------------|
|                 | Long-term opioid therapy (N=9,558), n (%) | No long-term opioid therapy (N=408,658), n (%) | Risk ratio (95% CI) | Long-term opioid therapy (N=9,558), n (%) | No long-term opioid therapy (N=9,558), n (%) | Risk ratio (95% CI) |
| ED visit        | 2,867 (30.0)                              | 32,323 (7.9)                                   | 3.80 (3.67,3.92)    | 2,867 (30.0)                              | 1,404 (14.7)                                 | 2.04 (1.93,2.16)    |
| Hospitalization | 2,139 (22.4)                              | 13,807 (3.4)                                   | 6.62 (6.36,6.90)    | 2,139 (22.4)                              | 735 (7.7)                                    | 2.91 (2.69,3.15)    |
| ICU             | 664 (7.0)                                 | 3,145 (0.8)                                    | 9.03 (8.33,9.80)    | 664 (7.0)                                 | 182 (1.9)                                    | 3.65 (3.10,4.29)    |
| Mechanical vent | 513 (5.4)                                 | 2,833 (0.7)                                    | 7.75 (7.07,8.50)    | 513 (5.4)                                 | 148 (1.6)                                    | 3.47 (2.89,4.15)    |
| Vasopressor     | 190 (2.0)                                 | 779 (0.2)                                      | 10.42 (8.9,12.2)    | 190 (2.0)                                 | 36 (0.4)                                     | 5.28 (3.70,7.53)    |
| Death (30-day)  | 425 (4.5)                                 | 4,500 (1.1)                                    | 4.04 (3.67,4.46)    | 425 (4.5)                                 | 217 (2.3)                                    | 1.96 (1.67,2.30)    |

N: total number of patients in the cohort; n: number of patients with the health outcome; 95% CI: 95% confidence intervals

Mechanical vent: Mechanical ventilation

Supplementary Table 3. Clinical presentation among COVID-19 patients on long-term opioid therapy compared to COVID-19 patients not on long-term opioid therapy

| Clinical Presentation | Before propensity score matching             |                                                   |                        | After propensity score matching              |                                                 |                        |
|-----------------------|----------------------------------------------|---------------------------------------------------|------------------------|----------------------------------------------|-------------------------------------------------|------------------------|
|                       | Long-term opioid therapy<br>(N=9,558), n (%) | No long-term opioid therapy<br>(N=408,658), n (%) | Risk ratio<br>(95% CI) | Long-term opioid therapy<br>(N=9,558), n (%) | No long-term opioid therapy<br>(N=9,558), n (%) | Risk ratio<br>(95% CI) |
| Cough                 | 1,458 (15.3)                                 | 15,350 (3.8)                                      | 4.06 (3.87,4.27)       | 1,458 (15.3)                                 | 707 (7.4)                                       | 2.06 (1.89,2.25)       |
| Fever                 | 597 (6.2)                                    | 5,619 (1.4)                                       | 4.54 (4.18,4.93)       | 597 (6.2)                                    | 266 (2.8)                                       | 2.24 (1.94,2.58)       |
| ARDS                  | 195 (2.0)                                    | 996 (0.2)                                         | 8.37 (7.18,9.74)       | 195 (2.0)                                    | 49 (0.5)                                        | 3.98 (2.91,5.44)       |
| Hypoxemia             | 673 (7.0)                                    | 4,581 (1.1)                                       | 6.28 (5.80,6.79)       | 673 (7.0)                                    | 278 (2.9)                                       | 2.41 (2.10,2.76)       |
| Dyspnea               | 2,043 (21.4)                                 | 1,6467 (4.0)                                      | 5.31 (5.10,5.54)       | 2,043 (21.4)                                 | 936 (9.8)                                       | 2.18 (2.03,2.35)       |
| Thrombocytopenia      | 265 (2.8)                                    | 1,391 (0.3)                                       | 8.14 (7.15,9.27)       | 265 (2.8)                                    | 116 (1.2)                                       | 2.28 (1.84,2.84)       |

N: total number of patients in the cohort; n: number of patients with the health outcome; 95% CI: 95% confidence intervals

Mechanical vent: Mechanical ventilation
